# Supplementary material for: Low-energy shock waves evoke intracellular Ca2+ increases independently of sonoporation
Source: PubMed Central journal article supplement (PMC6397190; doi:10.1038/s41598-019-39806-x), 2019-03-01
Supplement: 41598_2019_39806_MOESM1_ESM.pdf [file 41598_2019_39806_MOESM1_ESM.pdf]

1 **Low-energy shock waves evoke intracellular Ca<sup>2+</sup> increases independently**  
2 **of sonoporation**

3

4

5 Toru Takahashi<sup>1</sup>, Keiichi Nakagawa<sup>2</sup>, Shigeru Tada<sup>1</sup>, Akira Tsukamoto<sup>1,\*</sup>

6

7

8 <sup>1</sup>Department of Applied Physics, Graduate School of Science and Engineering,  
9 National Defense Academy, Hashirimizu 1-10-20, Yokosuka, Kanagawa  
10 239-8686 Japan

11 <sup>2</sup>Department of Precise Engineering, Graduate School of Engineering, The  
12 University of Tokyo, Hongo 7-3-1, Bunkyo-ku, Tokyo 113-8656 Japan

13

14 \*Email: tsuka@nda.ac.jp

15

16 **SUPPLEMENTARY FIGURES**

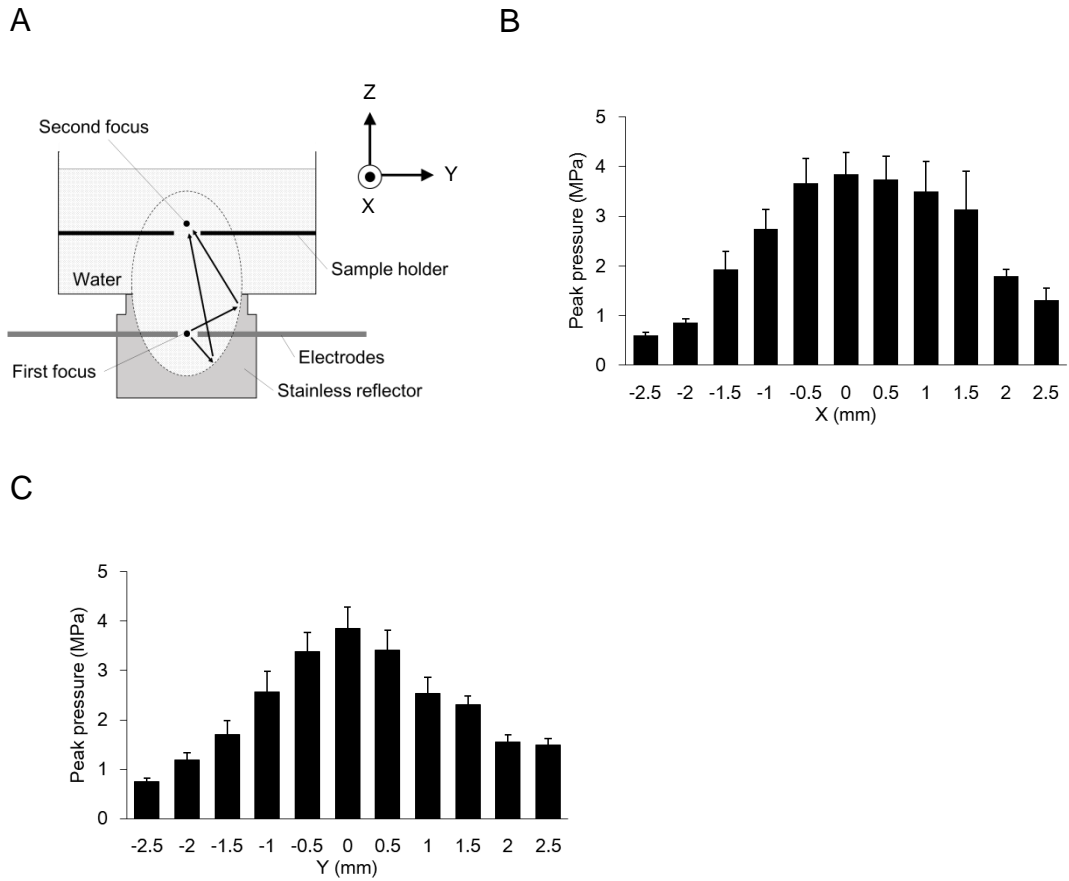

17

18 **Supplementary Figure S1.** Peak pressure distribution along X- and Y-axes. (A)

19 Shock waves were generated at the first focus on the spheroidal surface of a

20 stainless reflector,. Following the reflection, shock waves were refocused to the

21 second focus. The X- and Y-axes were set perpendicular shock wave transmis-

22 sion. Peak pressure distributions along the X-axis (B) and Y-axis (C) show uni-

23 form distribution close to the second focus.

24

25

26

27

A

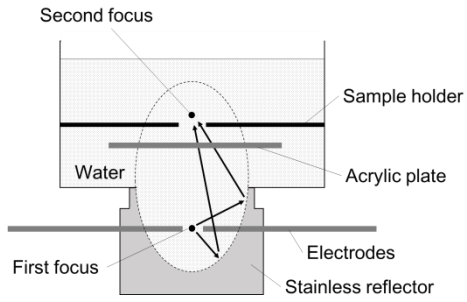

B

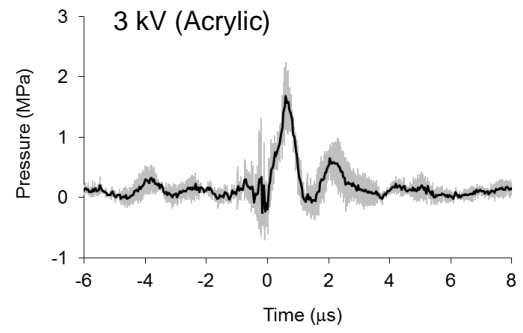

C

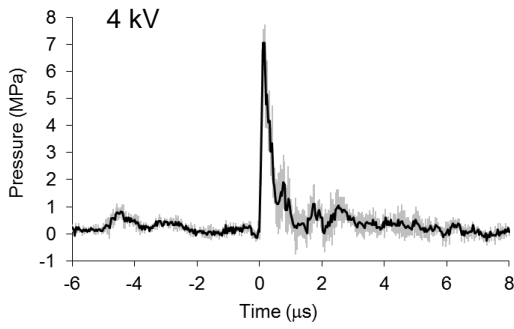

D

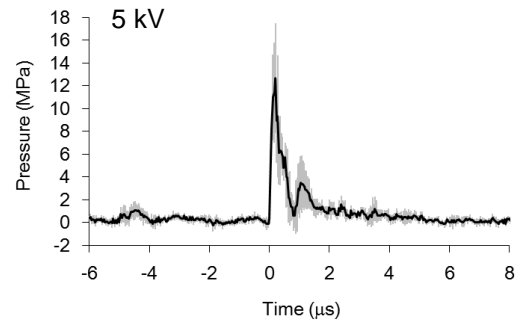

E

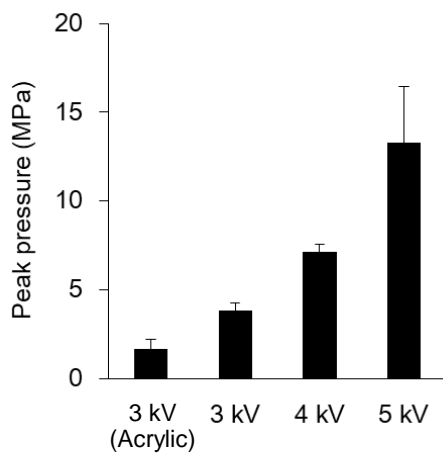

F

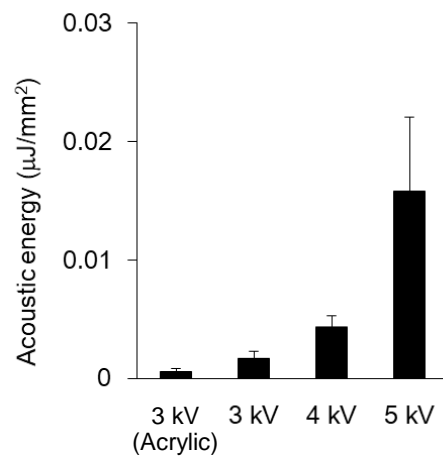

32 **Supplementary Figure S2.** Dependence of peak pressure and acoustic energy  
33 on shock wave irradiation conditions. (A) Peak pressure and acoustic energy  
34 were suppressed by inserting an acrylic plate. (B) A pressure profile of LESWs  
35 having a discharge voltage of 3 kV with the inserted acrylic plate (means  $\pm$  SEMs,  
36 N = 4). (C) Pressure profile of LESWs with a discharge voltage of 4 kV (means  $\pm$   
37 SEMs, N = 4). (D) A pressure profile of LESWs with a discharge voltage of 5 kV  
38 (means  $\pm$  SEMs, N = 4). Peak pressure (E) and acoustic energy (F) of shock  
39 waves generated and transmitted under different conditions.

40

41

42

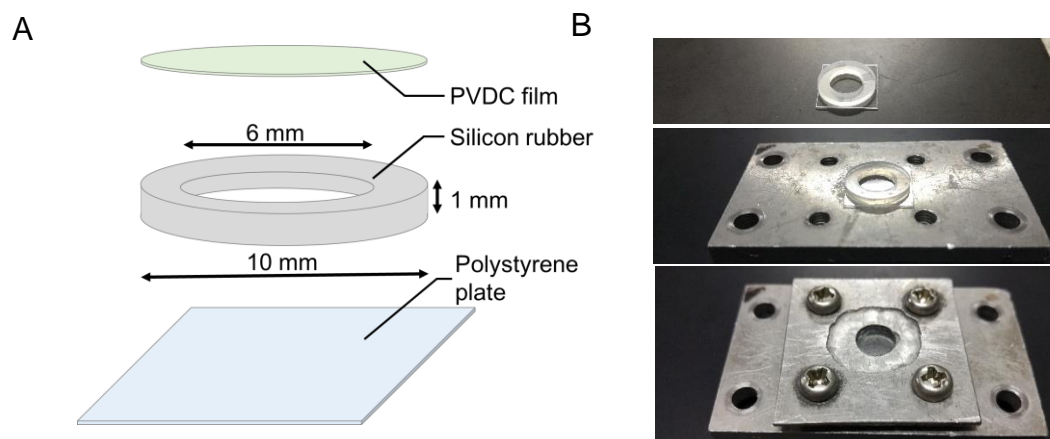

43

44

45 **Supplementary Figure S3.** Cell chamber and its holders. (A) Assembly of cell  
46 chamber. (B) Combining cell chamber with its holder before setting in the soni-  
47 cation chamber.

48
